# Supplementary material
Source: HighWire-hosted journal article supplement (https://bmjopen.bmj.com/content/12/9/e061159)
Supplement: inline-supplementary-material-1 [file inline-supplementary-material-1.pdf]

**e-Table 1:** Recruitment strategies used in the study, including psychiatric clinics, websites, apps and social media

| <b>Recruitment strategy 1:</b><br>Informative brochures about the study available at the site, which could be taken freely by the participants                                                                    |                                                                                                                                                                                                                                                                         |
|-------------------------------------------------------------------------------------------------------------------------------------------------------------------------------------------------------------------|-------------------------------------------------------------------------------------------------------------------------------------------------------------------------------------------------------------------------------------------------------------------------|
| <i>Site specification/type</i>                                                                                                                                                                                    | <i>Site location(s)</i>                                                                                                                                                                                                                                                 |
| Psychiatric outpatient polyclinics                                                                                                                                                                                | Østre Agder, Lister, Flekkefjord, Solvang, Strømme (Agder region); Lørenskog (Viken region); North of Norway (Tromsø and surrounding areas)                                                                                                                             |
| Outpatient polyclinic for anxiety                                                                                                                                                                                 | Flekkefjord (Agder region))                                                                                                                                                                                                                                             |
| Specialized outpatient polyclinic of psychosomatics and trauma                                                                                                                                                    | Lundsiden (Agder region))                                                                                                                                                                                                                                               |
| Psychiatric hospital ward                                                                                                                                                                                         | Hospital of South Norway (Sørlandet sykehus), Akershus Universitetssykehus HF in Lørenskog (Viken region)                                                                                                                                                               |
| Regional Section for Eating Disorders                                                                                                                                                                             | Oslo University Hospital, Villa Sult in Oslo                                                                                                                                                                                                                            |
| Public prenatal and postnatal care health clinics                                                                                                                                                                 | Oslo (Grunerløkka district, Østensjø), Stavanger, Bergen, Trondheim, Tromsø, Ås, Tingvoll, Hareid                                                                                                                                                                       |
| <b>Recruitment strategy 2:</b><br>Information about the study on selected pregnancy-motherhood specific websites, as well as medically oriented websites in Norwegian language, social media and pregnancy forums |                                                                                                                                                                                                                                                                         |
| General pregnancy / motherhood specific websites or Facebook page                                                                                                                                                 | www.ammehjelp.no (breastfeeding support network),<br>www.altformamma.no (general website for mothers),                                                                                                                                                                  |
| Medical-specific websites                                                                                                                                                                                         | www.hjelptilhjelp.no (portal for mental health); www.nhi.no (health portal for healthcare personnel and lay persons);<br>www.tryggmammamedisin.no (National medicines information centre for pregnant and breastfeeding women)                                          |
| Social media                                                                                                                                                                                                      | Facebook (featured ads and posts in pregnancy-related and mental health-related pages and groups), Twitter, featured google ads                                                                                                                                         |
| Pregnancy forums                                                                                                                                                                                                  | Kvinneguide (forum for women in general)                                                                                                                                                                                                                                |
| <b>Recruitment strategy 3:</b><br>Information about the study distributed by patient organizations and peers via social media                                                                                     |                                                                                                                                                                                                                                                                         |
| Social media                                                                                                                                                                                                      | Organization «Psykisk helse» (Mental health) via Twitter;<br>organization “Landsforening1001dager» (perinatal mental health organization) via their Facebook page; “Norske Kvinners Sanitetsforening” (Women association of Norway) via their Facebook and twitter page |

| <b>Recruitment strategy 4:</b><br>Information about the study distributed to <u>users of pregnancy-specific or women-specific apps</u> |                                                                                                                                                                                                                                                                                          |
|----------------------------------------------------------------------------------------------------------------------------------------|------------------------------------------------------------------------------------------------------------------------------------------------------------------------------------------------------------------------------------------------------------------------------------------|
| Apps                                                                                                                                   | “Clue”, an app to track ovulation and pregnancy planning;<br>“Helseoversikt”, an app recommended by all prenatal and postnatal health centres in Norway to track health appointments for mother and child, and other health-related information on pregnancy, motherhood and infant care |
