# Supplementary material
Source: HighWire-hosted journal article supplement (https://bmjopen.bmj.com/content/12/9/e061159)
Supplement: inline-supplementary-material-3 [file inline-supplementary-material-3.pdf]

**e-Table 2:** Type of reported mental illnesses in women planning a pregnancy (2a), mothers or pregnant (2b)**2.a:** *Self-reported Mental Illness Among Women Planning to Become Pregnant (N = 68)\**

| Self-reported illness | More than one year ago | Within the last year | Currently |
|-----------------------|------------------------|----------------------|-----------|
| Depression            | 24                     | 20                   | 24        |
| Anxiety               | 15                     | 18                   | 28        |
| OCD                   | 10                     | 2                    | 2         |
| ED                    | 19                     | 4                    | 5         |
| Other mental illness  | 9                      | 6                    | 11        |

\*Women could report more than one time point for each mental illness.

Abbreviations: OCD=Obsessive-compulsive disorders; ED=Eating Disorders.

**2.b:** *Self-reported Mental Illness Among Pregnant Women or Recent Mothers (N = 380)\**

| Self-reported illness | Before pregnancy | During 1 <sup>st</sup> trimester | During 2 <sup>nd</sup> trimester | During 3 <sup>rd</sup> trimester | After birth |
|-----------------------|------------------|----------------------------------|----------------------------------|----------------------------------|-------------|
| Depression            | 346              | 84                               | 51                               | 48                               | 101         |
| Anxiety               | 323              | 88                               | 64                               | 60                               | 102         |
| OCD                   | 51               | 10                               | 6                                | 5                                | 17          |
| ED                    | 105              | 17                               | 9                                | 12                               | 22          |
| Other mental illness  | 79               | 20                               | 12                               | 11                               | 26          |

\*Women could report more than one time point for each mental illness.

Abbreviations: OCD=Obsessive-compulsive disorders; ED=Eating Disorders.
