# Supplementary material
Source: HighWire-hosted journal article supplement (https://bmjopen.bmj.com/content/12/9/e061159)
Supplement: inline-supplementary-material-5 [file inline-supplementary-material-5.pdf]

**e-Table 3:** Non-weighted mean risk perception of exposures during pregnancy and while breastfeeding

| Substance                                                      | Mean risk score (SE) | 95% CI     | Median risk score | [Q1, Q3] | N   |
|----------------------------------------------------------------|----------------------|------------|-------------------|----------|-----|
| <b><i>Risk perception of exposures during pregnancy</i></b>    |                      |            |                   |          |     |
| Alcohol                                                        | 9.0 (0.1)            | [8.8, 9.2] | 10                | [8, 10]  | 442 |
| Antipsychotics                                                 | 6.8 (0.2)            | [6.5, 7.2] | 7                 | [5, 9]   | 245 |
| Antiepileptics                                                 | 6.6 (0.2)            | [6.1, 7.0] | 7                 | [5, 9]   | 150 |
| Anxiety and sleeping medications                               | 6.4 (0.1)            | [6.1, 6.7] | 6                 | [5, 8]   | 328 |
| Maternal mental illness <i>per se</i>                          | 5.8 (0.1)            | [5.5, 6.0] | 6                 | [4, 8]   | 423 |
| Antidepressants                                                | 4.7 (0.1)            | [4.4, 4.9] | 5                 | [3, 7]   | 383 |
| Cranberry                                                      | 1.0 (0.1)            | [0.8, 1.2] | 0                 | [0, 1]   | 301 |
| <b><i>Risk perception of exposures while breastfeeding</i></b> |                      |            |                   |          |     |
| Alcohol                                                        | 7.1 (0.1)            | [6.8, 7.4] | 8                 | [5, 10]  | 437 |
| Antipsychotics                                                 | 6.3 (0.2)            | [5.9, 6.6] | 6                 | [4, 9]   | 248 |
| Anxiety and sleeping medications                               | 6.1 (0.2)            | [5.8, 6.4] | 6                 | [4, 9]   | 321 |
| Antiepileptics                                                 | 6.0 (0.2)            | [5.5, 6.4] | 6                 | [4, 8]   | 152 |
| Maternal mental illness <i>per se</i>                          | 5.6 (0.2)            | [5.3, 5.9] | 6                 | [3, 8]   | 417 |
| Antidepressants                                                | 4.3 (0.1)            | [4.0, 4.6] | 4                 | [2, 6]   | 376 |
| Cranberry                                                      | 1.0 (0.1)            | [0.7, 1.2] | 0                 | [0, 1]   | 298 |
