# Supplementary material
Source: HighWire-hosted journal article supplement (https://bmjopen.bmj.com/content/12/9/e061159)
Supplement: inline-supplementary-material-7 [file inline-supplementary-material-7.pdf]

**e-Table 4:** Descriptive statistics of risk perception for participants who had no missing responses and no ‘unknown’ responses for the risk perception items (N = 125), weighted

| Substance                                                      | Mean risk score (SE) | 95% CI     |
|----------------------------------------------------------------|----------------------|------------|
| <b><i>Risk perception of exposures during pregnancy</i></b>    |                      |            |
| Alcohol                                                        | 8.5 (.3)             | [8.0, 9.0] |
| Antiepileptics                                                 | 6.7 (.3)             | [6.2, 7.3] |
| Antipsychotics                                                 | 6.7 (.3)             | [6.1, 7.3] |
| Anxiety and sleeping medications                               | 6.6 (.2)             | [6.2, 7.1] |
| Maternal mental illness <i>per se</i>                          | 5.9 (.3)             | [5.2, 6.5] |
| Antidepressants                                                | 4.6 (.3)             | [4.0, 5.3] |
| Cranberry                                                      | 1.1 (.2)             | [.7, 1.5]  |
| <b><i>Risk perception of exposures while breastfeeding</i></b> |                      |            |
| Alcohol                                                        | 6.4 (.4)             | [5.7, 7.1] |
| Anxiety and sleeping medications                               | 6.3 (.2)             | [5.8, 6.8] |
| Antiepileptics                                                 | 6.1 (.3)             | [5.6, 6.6] |
| Antipsychotics                                                 | 6.1 (.3)             | [5.5, 6.8] |
| Maternal mental illness <i>per se</i>                          | 6.1 (.3)             | [5.5, 6.6] |
| Antidepressants                                                | 4.2 (.3)             | [3.5, 4.9] |
| Cranberry                                                      | 1.2 (.3)             | [.6, 1.8]  |
