# Supplementary material
Source: HighWire-hosted journal article supplement (https://bmjopen.bmj.com/content/12/9/e061159)
Supplement: inline-supplementary-material-8 [file inline-supplementary-material-8.pdf]

**e-Table 5:** Distribution of key maternal characteristics by number of psychotropic medication risk rated as “unknown” by women for exposure in pregnancy and while breastfeeding

|                                                                  | Number of “unknown” responses in relation to risk perception of all listed psychotropic medications during pregnancy |                  |                            | Number of “unknown” responses in relation to risk perception of all listed psychotropic medications while breastfeeding |                  |                            |
|------------------------------------------------------------------|----------------------------------------------------------------------------------------------------------------------|------------------|----------------------------|-------------------------------------------------------------------------------------------------------------------------|------------------|----------------------------|
|                                                                  | None                                                                                                                 | One psychotropic | More than one psychotropic | None                                                                                                                    | One psychotropic | More than one psychotropic |
|                                                                  | (n=144)                                                                                                              | (n=105)          | (n=199)                    | (n=150)                                                                                                                 | (n=100)          | (n=198)                    |
|                                                                  | <i>n (%)</i>                                                                                                         | <i>n (%)</i>     | <i>n (%)</i>               | <i>n (%)</i>                                                                                                            | <i>n (%)</i>     | <i>n (%)</i>               |
| <b>Age (years)</b>                                               |                                                                                                                      |                  |                            |                                                                                                                         |                  |                            |
| 18-29                                                            | 48 (33.3)                                                                                                            | 45 (42.9)        | 77 (38.7)                  | 53 (35.3)                                                                                                               | 42 (42.0)        | 75 (37.9)                  |
| 30-49                                                            | 96 (66.7)                                                                                                            | 60 (57.1)        | 122 (61.3)                 | 97 (64.7)                                                                                                               | 58 (58.0)        | 123 (62.1)                 |
| <b>Educational attainment (current or at time of conception)</b> |                                                                                                                      |                  |                            |                                                                                                                         |                  |                            |
| Primary school                                                   | 6 (4.2)                                                                                                              | <5               | 12 (6.0)                   | 6 (4.0)                                                                                                                 | <5               | 12 (6.1)                   |
| High school                                                      | 26 (18.1)                                                                                                            | 28 (26.7)        | 42 (21.1)                  | 28 (18.7)                                                                                                               | 26 (26.0)        | 42 (21.2)                  |
| University/college                                               | 110 (76.4)                                                                                                           | 72 (68.6)        | 134 (67.3)                 | 114 (76.0)                                                                                                              | 70 (70.0)        | 132 (66.7)                 |
| Other                                                            | <5                                                                                                                   | <5               | 10 (5.0)                   | <5                                                                                                                      | <5               | 11 (5.6)                   |
| Missing                                                          | -                                                                                                                    | -                | -                          | -                                                                                                                       | -                | <5                         |
| <b>Work situation (current or at time of conception)</b>         |                                                                                                                      |                  |                            |                                                                                                                         |                  |                            |
| Student                                                          | 13 (9.0)                                                                                                             | 6 (5.7)          | 13 (6.5)                   | 13 (8.7)                                                                                                                | 5 (5.0)          | 14 (7.1)                   |
| Homemaker                                                        | 8 (5.6)                                                                                                              | 8 (7.6)          | 9 (4.5)                    | 8 (5.3)                                                                                                                 | 9 (9.0)          | 8 (4.0)                    |
| Health worker                                                    | 48 (33.3)                                                                                                            | 9 (8.6)          | 19 (9.6)                   | 49 (32.7)                                                                                                               | 8 (8.0)          | 19 (9.6)                   |
| Other paid work                                                  | 54 (37.5)                                                                                                            | 66 (62.9)        | 135 (67.8)                 | 59 (39.3)                                                                                                               | 63 (63.0)        | 133 (67.2)                 |
| Job seeker / Other                                               | 21 (14.6)                                                                                                            | 16 (15.2)        | 23 (11.6)                  | 21 (14.0)                                                                                                               | 15 (15.0)        | 24 (12.1)                  |
| <b>Norwegian as main language</b>                                |                                                                                                                      |                  |                            |                                                                                                                         |                  |                            |
| Yes                                                              | 131 (91.0)                                                                                                           | 90 (85.7)        | 184 (92.5)                 | 135 (90.0)                                                                                                              | 86 (86.0)        | 184 (92.9)                 |
| No                                                               | 13 (9.0)                                                                                                             | 14 (13.3)        | 15 (7.5)                   | 14 (9.3)                                                                                                                | 14 (14.0)        | 14 (7.1)                   |
| Missing                                                          | -                                                                                                                    | <5               | -                          | <5                                                                                                                      | -                | -                          |
| <b>Self-reported number of mental illnesses</b>                  |                                                                                                                      |                  |                            |                                                                                                                         |                  |                            |
| One                                                              | 33 (22.9)                                                                                                            | 22 (21.0)        | 55 (27.6)                  | 35 (23.3)                                                                                                               | 21 (21.0)        | 54 (27.3)                  |
| Two                                                              | 50 (34.7)                                                                                                            | 42 (40.0)        | 80 (40.2)                  | 49 (32.7)                                                                                                               | 41 (41.0)        | 82 (41.1)                  |
| Three or more                                                    | 61 (42.4)                                                                                                            | 41 (39.1)        | 64 (32.2)                  | 66 (44.0)                                                                                                               | 38 (38.0)        | 62 (31.3)                  |
